# Supplementary material for: Nucleosome conformation dictates the histone code
Source: eLife. 2024 Feb 6;13:e78866. doi: 10.7554/eLife.78866 (PMC10876215; doi:10.7554/eLife.78866)
Supplement: Supplementary file 1. — (A): dCypher data analysis EC50rel (lower CI95 - upper CI95). (B) dCypher analysis select EC50rel comparison. (C) dCypher analysis t-tests. (D) Figure 1C raw data (GST-PHD-BD; peptides). (E) Figure 1D raw data (GST-PHD-BD; nucleosomes). (F) Figure 2B upper raw data (GST-PHD-BD N3007A; nucleosomes). (G) Figure 2B lower raw data (GST-PHD-BD W2891A; nucleosomes). (H) Figure 3B raw data 6His-PHD-BD; nucleosomes. (I) Figure 5A raw data (GST-PHD-BD; heterotypic nucleosomes). (J) Extended Figure 1B raw data (GST-PHD-BD; peptide screen). (K) Extended Figure 1C raw data (GST-PHD-BD; nucleosome screen). (L) Extended Figure 1D raw data (GST-PHD-BD; peptides). (M) Extended Figure 1E raw data (GST-PHD-BD; nucleosomes). (N) Extened Figure 1F raw data (GST-PHD-BD; nucleosomes). (O) Extended Figure 2C raw data (6His-PHD; peptides). (P) Extended Figure 2D raw data (6His-PHD; nucleosomes).(Q) Extended Figure 2E raw data (GST-PHD; nucleosomes). (R) Extended Figure 2F raw data (6His-BD; peptides). (S) Extended Figure 2G raw data (6His-BD; nucleosomes). (T) Extended Figure 3D raw data (Anti-H3K4me3; nucleosomes). (U) Extended Figure 4A raw data (GST-BRD4 BD; peptides). (V) Extended Figure 4B raw data (GST-BRD4 BD; nucleosomes) [file elife-78866-supp1.xlsx]

## Sheet: CONTENTS
		Tab A : dCypher Data Analysis EC50rel (lower CI95 - upper CI95)
		Tab B : dCypher Analysis select EC50rel Comparisons
		Tab C : dCypher Analysis t-tests
		Tab D : Figure 1C Raw Data (GST-PHD-BD; Peptides)
		Tab E : Figure 1D Raw Data (GST-PHD-BD; Nucleosomes)
		Tab F : Figure 2B Upper Raw Data (GST-PHD-BD N3007A; Nucleosomes)
		Tab G : Figure 2B Lower Raw Data (GST-PHD-BD W2891A; Nucleosomes)
		Tab H : Figure 3B Raw Data (6His-PHD-BD; Nucleosomes)
		Tab I : Figure 5A Raw Data (GST-PHD-BD; Heterotypic Nucleosomes)
		Tab J : Extended Figure 1B Raw Data (GST-PHD-BD; Peptide Screen)
		Tab K : Extended Figure 1C Raw Data (GST-PHD-BD; Nucleosome Screen)
		Tab L : Extended Figure 1D Raw Data (GST-PHD-BD; Peptides)
		Tab M : Extended Figure 1E Raw Data (GST-PHD-BD; Nucleosomes)
		Tab N : Extened Figure 1F Raw Data (GST-PHD-BD; Nucleosomes)
		Tab O : Extended Figure 2C Raw Data (6His-PHD; Peptides)
		Tab P : Extended Figure 2D Raw Data (6His-PHD; Nucleosomes)
		Tab Q : Extended Figure 2E Raw Data (GST-PHD; Nucleosomes)
		Tab R : Extended Figure 2F Raw Data (6His-BD; Peptides)
		Tab S : Extended Figure 2G Raw Data (6His-BD; Nucleosomes)
		Tab T : Extended Figure 3D Raw Data (Anti-H3K4me3; Nucleosomes)
		Tab U : Extended Figure 4A Raw Data (GST-BRD4 BD; Peptides)
		Tab V : Extended Figure 4B Raw Data (GST-BRD4 BD; Nucleosomes)

## Sheet: A_dCypher Analysis
How to compute EC50's and error (in GraphPad Prsim 8)
1) Exclude data beyond hook point (ensure proper top and bottom fits). Hook point defined by assay saturation / decline in signal at higher concentrations of query.
2) Transform data using Log(X)
3) Plot transformed data using non-linear regression 4PL sigmoidal curve fit. Also, select "output tab" --> select "create summary table" --> select "parameters with SE"
4) Where necessary, constrain top or bottom bottoms for proper fit to actual max or min for each curve. For sharp hook points - constrain to average maximum of target. If binding detected but plateau not reached constrain to highest max signal of comparable target for best estimate.
5) In Graphpad Prism summary table, Log(EC50) +/- SEM is reported. In transform table of results, 95% Confidence Interval is reported for the Log(EC50).
6) Use antilog to convert to EC50 or Confidence Intervals. Note: It is not appropriate to use antilog on SEM.
If reaches plateau, remove hooked points and determine EC50. If plateau not reached, constrain to highest signal of similar target. If EC50 is greater than max conc tested report > max conc.
			ND
			notes: excluded points references hook points not included in logEC50 calculation; refers to points from max concentration tested, i.e. 1=1e-6 M
Figure 1
GST BPTF PHD-BD (Figure 1C)	high constraint	Exluded pts	Log EC50rel, M	SEM	CI95 - Lower	CI95 - Upper	EC50rel, nM	CI95 - Lower	CI95 - Upper
H3 1-20	296084	1	-6.85022	0.635934	too wide	too wide	141.182	too wide	too wide
H3K4me3	auto	1-4	-9.05687	0.0311164	-9.123	-8.99	0.877271	0.753356	1.02329
H3K4me3triac	auto	1-4	-8.88591	0.040612	-8.97	-8.801	1.30044	1.07152	1.58125
H3tetraac	auto	1-2	-8.62861	0.0266191	-8.685	-8.57	2.35177	2.06538	2.69153
H4 1-23	407580	1-2	-7.53719	0.0604001	-7.689	-7.397	29.0276	20.4644	40.0867
H4tetraac	auto	1-3	-9.00115	0.0227555	-9.05	-8.953	0.99736	0.891251	1.11429
GST BPTF PHD-BD (Figure 1D)	high constraint	Exluded pts	Log EC50rel, M	SEM	CI95 - Lower	CI95 - Upper	EC50rel, nM	CI95 - Lower	CI95 - Upper
Nuc-unmodified			-6.60042	0.381571	250.944	353.211	146.711	2.49961e+11	3.53498e+11	no binding
H3K4me3	auto	N/A	-7.10887	0.0226292	-7.156	-7.061	77.8264	69.8232	86.896
H3K4me3triac	auto	1	-8.52482	0.0238897	-8.622	-8.49	2.98663	2.38781	3.23594
H3tetraac	auto	N/A	-7.21453	0.00685272	-7.229	-7.2	61.02	59.0201	63.0957
H4tetraac			-7.30756	1.29637	49.2535	925.312	46.7642	486.038	687.362	no binding
Table (Figure 1E)	high constraint	Exluded pts	Log EC50rel, M	SEM	CI95 - Lower	CI95 - Upper	EC50rel, nM	CI95 - Lower	CI95 - Upper
H3K4me3 (1-20)	auto	1-4	-9.05687	0.0311164	-9.123	-8.99	0.877271	0.753356	1.02329
H3K4me2 (1-20)	auto	1-4	-9.46395	0.0139727	-9.494	-9.433	0.343598	0.320627	0.368978
H3K4me1 (1-20)	auto	1-4	-9.44595	0.0180442	-9.485	-9.407	0.358134	0.327341	0.391742
H3K4me3triac (1-20)	auto	1-4	-8.88591	0.040612	-8.97	-8.801	1.30044	1.07152	1.58125
H3tetraac (1-20)	auto	1-2	-8.62861	0.0266191	-8.685	-8.57	2.35177	2.06538	2.69153
H4tetraac (1-23)	auto	1-3	-9.00115	0.0227555	-9.05	-8.953	0.99736	0.891251	1.11429
H3 1-20	296084	1	-6.85022	0.635934	too wide	too wide	141.182	too wide	too wide
H4 1-23	407580	1-2	-7.53719	0.0604001	-7.689	-7.397	29.0276	20.4644	40.0867
H3K4me3	auto	N/A	-7.10887	0.0226292	-7.156	-7.061	77.8264	69.8232	86.896
H3K4me2										no binding
H3K4me1										no binding
H3K4me3triac	auto	1	-8.52482	0.0238897	-8.622	-8.49	2.98663	2.38781	3.23594
H3tetraac	auto	N/A	-7.21453	0.00685272	-7.229	-7.2	61.02	59.0201	63.0957
H4tetraac			-7.30756	1.29637	49.2535	925.312	46.7642	486.038	687.362	no binding
Nuc-unmodified			-6.60042	0.381571	250.944	353.211	146.711	2.49961e+11	3.53498e+11	no binding
Figure 2
PHD-BDmut N3007A (Figure 2B upper)	high constraint	Exluded pts	Log EC50rel, M	SEM	CI95 - Lower	CI95 - Upper	EC50rel, nM	CI95 - Lower	CI95 - Upper
NCP-unmodified	-7.32537	-7.32537	-7.32537	5.16889e+17			-7.32537			no binding
H3K4me3	auto	N/A	-7.4158	0.00897821	-7.434	-7.395	38.3887	36.8129	40.2717
H3tetraac	-7.32537	-7.32537	-7.32537	-7.32537			-7.32537			no binding
H3K4me3triac	auto	N/A	-7.93535	0.00438379	-7.945	-7.926	11.6052	11.3501	11.8577
H4tetraac	-7.32537	-7.32537	-7.32537	-7.32537	-7.32537	-7.32537	-7.32537			no binding
PHDmut-BD W2891A (Figure 2B lower)	high constraint	Exluded pts	Log EC50rel, M	SEM	CI95 - Lower	CI95 - Upper	EC50rel, nM	CI95 - Lower	CI95 - Upper
NCP-unmodified										no binding
H3K4me3										no binding
H3tetraac										no binding
H3K4me3triac										no binding
H4tetraac										no binding
Table (Figure 2C)	high constraint	Exluded pts	Log EC50rel, M	SEM	CI95 - Lower	CI95 - Upper	EC50rel, nM	CI95 - Lower	CI95 - Upper
H3K4me3 (PHD-BDmut)	auto	N/A	-7.4158	0.00897821	-7.434	-7.395	38.3887	36.8129	40.2717
H3K4me3triac (PHD-BDmut)	auto	N/A	-7.93535	0.00438379	-7.945	-7.926	11.6052	11.3501	11.8577
H3tetraac (PHD-BDmut)	-7.32537	-7.32537	-7.32537	-7.32537	-7.32537	-7.32537	-7.32537			no binding
H4tetraac (PHD-BDmut)	-7.32537	-7.32537	-7.32537	-7.32537	-7.32537	-7.32537	-7.32537			no binding
NCP-unmodified (PHD-BDmut)	-7.32537	-7.32537	-7.32537	-7.32537	-7.32537	-7.32537	-7.32537			no binding
H3K4me3 (PHDmut-BD)	-7.32537	-7.32537	-7.32537	-7.32537	-7.32537	-7.32537	-7.32537			no binding
H3K4me3triac (PHDmut-BD)	-7.32537	-7.32537	-7.32537	-7.32537	-7.32537	-7.32537	-7.32537			no binding
H3tetraac (PHDmut-BD)	-7.32537	-7.32537	-7.32537	-7.32537	-7.32537	-7.32537	-7.32537			no binding
H4tetraac (PHDmut-BD)	-7.32537	-7.32537	-7.32537	-7.32537	-7.32537	-7.32537	-7.32537			no binding
NCP-unmodified (PHDmut-BD)	-7.32537	-7.32537	-7.32537	-7.32537	-7.32537	-7.32537	-7.32537			no binding
	constraint note: prism value for H3K4me3,tri ac.
Figure 3
GST-PHD-BD (Figure 3B)	high constraint	Exluded pts	Log EC50rel, M	SEM	CI95 - Lower	CI95 - Upper	EC50rel, nM	CI95 - Lower	CI95 - Upper
NCP-unmodified										no binding
H3K4me3	auto	1	-7.162	0.002	-7.165	-7.158	68.9	68.3912	69.5024
H3K14ac										no binding
H3triac										no binding
H3K4me3,K14ac	auto	2	-8.136	0.007	-8.152	-8.12	7.31	7.04693	7.58578
H3K4me3triac	auto	2	-8.314	0.016	-8.348	-8.28	4.85	4.48745	5.24807
H3.1<Unmod> · H3.1<K4me3>	auto	N/A	-6.554	0.002	-6.558	-6.55	280	276.694	281.838
H3.1<Unmod> · H3.1<K14ac>										no binding
H3.1<Unmod> · H3.1<K4me3,K14ac>	auto	2	-7.968	0.006	-7.981	-7.955	10.8	10.4472	11.0917
H3.1<K4me3> · H3.1<K14ac>	auto	N/A	-6.581	0.005	-6.59	-6.572	263	257.04	267.917
H3.1<K4me3> · H3.1<triac>	auto	N/A	-6.804	0.005	-6.816	-6.793	157	152.757	161.065
Figure 3
HIS-PHD-BD (Figure 3C)	high constraint	Exluded pts	Log EC50rel, M	SEM	CI95 - Lower	CI95 - Upper	EC50rel, nM	CI95 - Lower	CI95 - Upper
NCP-unmodified	-7.32537	-7.32537	-7.32537	-7.32537			-7.32537			no binding
H3K4me3	260442	N/A	-5.78158	0.0147139	-5.811	-5.749	> 1000	>1000	>1000	weak binding
H3K4me3triac	auto	1	-7.81629	0.0150626	-7.848	-7.783	15.2653	14.1906	16.4816
NΔ1H3K4me3triac	-7.32537	-7.32537	-7.32537	-7.32537			-7.32537	-7.32537	-7.32537	no binding
Extended Figure 1
GST BPTF PHD-BD (Ext. Figure 1D)
Peptide	high constraint	Exluded pts	Log EC50rel, M	SEM	CI95 - Lower	CI95 - Upper	EC50rel, nM	CI95 - Lower	CI95 - Upper
H3 (1-20)	232704	1	-6.8572	0.298084	too wide	too wide	138.932	too wide	too wide
H3K4me1 (1-20)	auto	1-4	-9.44595	0.0180442	-9.485	-9.407	0.358134	0.327341	0.391742
H3K4me2 (1-20)	auto	1-4	-9.46395	0.0139727	-9.494	-9.433	0.343598	0.320627	0.368978
H3K4me3 (1-20)	auto	1-4	-9.37533	0.0333061	-9.446	-9.302	0.421375	0.358096	0.498884
	Constraint note: average max of H3 (1-20); reached plateau.
GST BPTF PHD-BD (Ext. Figure 1E)	high constraint	Exluded pts	Log EC50rel, M	SEM	CI95 - Lower	CI95 - Upper	EC50rel, nM	CI95 - Lower	CI95 - Upper
NCP-unmodified
H3K4me1
H3K4me2
H3K4me3	auto	N/A	-7.63493	0.0100712	-7.656	-7.614	23.1775	22.08	24.322
GST BPTF PHD-BD (Ext. Figure 1F)	high constraint	Exluded pts	Log EC50rel, M	SEM	CI95 - Lower	CI95 - Upper	EC50rel, nM	CI95 - Lower	CI95 - Upper
NCP-unmodified										no binding
H3K4me3,K9ac	auto	N/A	-7.58293	0.00998684	-7.604	-7.563	26.1258	24.8886	27.3527
H3K4me3,K14ac	auto	N/A	-8.20153	0.00456056	-8.211	-8.192	6.28734	6.15177	6.42688
H3K4me3,K18ac	auto	N/A	-8.15041	0.0126515	-8.177	-8.124	7.07277	6.65273	7.51623
H3K4me3	auto	N/A	-7.18851	0.00414866	-7.197	-7.18	64.7876	63.5331	66.0693
H3K4me3triac	auto	1	-8.30857	0.0158511	-8.342	-8.275	4.91396	4.54988	5.30884
H3triac										no binding
H3tetraac	auto	N/A	-6.89054	0.0197677	-6.932	-6.843	128.664	116.95	143.549
Table (Ext. Figure 1G)	high constraint	Exluded pts	Log EC50rel, M	SEM	CI95 - Lower	CI95 - Upper	EC50rel, nM	CI95 - Lower	CI95 - Upper
H3K4me3	auto	N/A	-7.18851	0.00414866	-7.197	-7.18	64.7876	63.5331	66.0693
H3K4me3triac	auto	1	-8.30857	0.0158511	-8.342	-8.275	4.91396	4.54988	5.30884
H3K4me3,K14ac	auto	N/A	-8.20153	0.00456056	-8.211	-8.192	6.28734	6.15177	6.42688
H3K4me3,K18ac	auto	N/A	-8.15041	0.0126515	-8.177	-8.124	7.07277	6.65273	7.51623
H3K4me3,K9ac	auto	N/A	-7.58293	0.00998684	-7.604	-7.563	26.1258	24.8886	27.3527
H3triac										no binding
H3tetraac	auto	N/A	-6.89054	0.0197677	-6.932	-6.843	128.664	116.95	143.549
NCP-unmodified										no binding
Extended Figure 2
Table (Ext. Figure 2A)	high constraint	Exluded pts	Log EC50rel, M	SEM	CI95 - Lower	CI95 - Upper	EC50rel, nM	CI95 - Lower	CI95 - Upper
H3K4me3 (1-20; 6His-PHD)	auto	N/A	-7.37917	0.0139328	-7.408	-7.349	41.7669	39.0841	44.7713
H3K4me3triac (1-20; 6His-PHD)	auto	N/A	-6.99992	0.0081186	-7.017	-6.982	100.019	96.1612	104.232
H3tetraac (1-20; 6His-PHD)										no binding
H3 1-20 (6His-PHD)	426889	N/A	-5.57893	0.0274839	-5.641	-5.526	>1000	>1000	>1000
H3K4me3triac (1-20; 6His-BD)	496106	N/A	-5.81138	0.00209508	-5.816	-5.807	>1000	>1000	>1000
H3tetraac (1-20; 6His-BD)	496106	N/A	-5.79352	0.00189048	-5.797	-5.79	>1000	>1000	>1000
H4tetraac (1-20; 6His-BD)	496106	N/A	-6.64901	0.00795812	-6.666	-6.632	224.383	215.774	233.346
H3 1-20 (6His-BD)										no binding
H4 1-23 (6His-BD)										no binding
Table (Ext. Figure 2B)	high constraint	Exluded pts	Log EC50rel, M	SEM	CI95 - Lower	CI95 - Upper	EC50rel, nM	CI95 - Lower	CI95 - Upper
H3K4me3 (6His-PHD)	340702	N/A	-5.19672	0.0215797	-5.242	-5.151	>1000	>1000	>1000
H3K4me3triac (6His-PHD)	340702	N/A	-6.48772	0.00606036	-6.501	-6.475	325.297	315.5	334.965
H3tetraac (6His-PHD)										no binding
NCP-unmodified (6His-PHD)										no binding
H3K4me3 (6His-BD)										no binding
H3K4me3triac (6His-BD)										no binding
H3tetraac (6His-BD)										no binding
H3triac (6His-BD)										no binding
H4tetraac (6His-BD)										no binding
NCP-unmodified (6His-BD)										no binding
H3K4me3 (GST-PHD)	766747	N/A	-6.46111	0.00101312	-6.463	-6.459	345.848	344.35	347.536
H3K4me3triac (GST-PHD)	766747	N/A	-7.41256	0.00225997	-7.417	-7.408	38.6755	38.2825	39.0841
H3K4me3,K14ac (GST-PHD)	766747	N/A	-7.00894	0.0133749	-7.036	-6.982	97.9618	92.045	104.232
H3K4me3,K18ac (GST-PHD)	766747	N/A	-6.94033	0.0136776	-6.969	-6.911	114.727	107.399	122.744
H3K4me3,K9ac (GST-PHD)	766747	N/A	-6.99504	0.0118174	-7.019	-6.971	101.15	95.7194	106.905
H3triac (GST-PHD)										no binding
NCP-unmodified (GST-PHD)										no binding
6His BPTF PHD (Ext. Figure 2C)	high constraint	Exluded pts	Log EC50rel, M	SEM	CI95 - Lower	CI95 - Upper	EC50rel, nM	CI95 - Lower	CI95 - Upper
H3 1-20	426889	N/A	-5.57893	0.0274839	-5.641	-5.526	>1000	>1000	>1000
H3K4me3	auto	N/A	-7.37917	0.0139328	-7.408	-7.349	41.7669	39.0841	44.7713
H3tetraac										no binding
H3K4me3triac	auto	N/A	-6.99992	0.0081186	-7.017	-6.982	100.019	96.1612	104.232
6His BPTF PHD (Ext. Figure 2D)	high constraint	Exluded pts	Log EC50rel, M	SEM	CI95 - Lower	CI95 - Upper	EC50rel, nM	CI95 - Lower	CI95 - Upper
NCP-unmodified										no binding
H3K4me3	340702	N/A	-5.19672	0.0215797	-5.242	-5.151	>1000	>1000	>1000
H3tetraac										no binding
H3K4me3triac	340702	N/A	-6.48772	0.00606036	-6.501	-6.475	325.297	315.5	334.965
GST BPTF PHD (Ext. Figure 2E)	high constraint	Exluded pts	Log EC50rel, M	SEM	CI95 - Lower	CI95 - Upper	EC50rel, nM	CI95 - Lower	CI95 - Upper
NCP-unmodified										no binding
H3K4me3,K9ac	766747	N/A	-6.99504	0.0118174	-7.019	-6.971	101.15	95.7194	106.905
H3K4me3,K14ac	766747	N/A	-7.00894	0.0133749	-7.036	-6.982	97.9618	92.045	104.232
H3K4me3,K18ac	766747	N/A	-6.94033	0.0136776	-6.969	-6.911	114.727	107.399	122.744
H3K4me3	766747	N/A	-6.46111	0.00101312	-6.463	-6.459	345.848	344.35	347.536
H3K4me3triac	766747	N/A	-7.41256	0.00225997	-7.417	-7.408	38.6755	38.2825	39.0841
H3triac										no binding
	contraint note: prism value for H3K4me3,tri ac. The signal plateaued
6His BD (Ext. Figure 2F)	high constraint	Exluded pts	Log EC50rel, M	SEM	CI95 - Lower	CI95 - Upper	EC50rel, nM	CI95 - Lower	CI95 - Upper
H3 1-20	516289	N/A	-12938.6	1.31585e+06						no binding
H3K4,9,14,18ac	496106	N/A	-5.79352	0.00189048	-5.797	-5.79	>1000	>1000	>1000
H3K4me3triac	496106	N/A	-5.81138	0.00209508	-5.816	-5.807	>1000	>1000	>1000
H4 1-23	516289	N/A								no binding
H4K5,8,12,16ac	496106	N/A	-6.64901	0.00795812	-6.666	-6.632	224.383	215.774	233.346
6His BD (Ext. Figure 2G)	high constraint	Exluded pts	Log EC50rel, M	SEM	CI95 - Lower	CI95 - Upper	EC50rel, nM	CI95 - Lower	CI95 - Upper
NCP-unmodified										no binding
H3K4me3										no binding
H3triac										no binding
H3tetraac										no binding
H3K4me3triac										no binding
H4tetraac										no binding
Extended Figure 4
Antibody binding (Ext. Figure 4D)	high constraint	Exluded pts	Log EC50rel, M	SEM	CI95 - Lower	CI95 - Upper	EC50rel, nM	CI95 - Lower	CI95 - Upper
NCP-unmodified
H3K4me3	auto	1	-9.40931	0.0238129	-9.459	-9.359	0.389662	0.347536	0.437522
H3K4me3triac	auto	1	-9.45881	0.0166766	-9.494	-9.423	0.347686	0.320627	0.377572
N△1H3K4me3triac	auto	1	-9.49384	0.0219923	-9.54	-9.447	0.320746	0.288403	0.357273
Extended Figure 6
BRD4 peptide (Ext. Figure 6A)	high constraint	Exluded pts	Log EC50rel, M	SEM	CI95 - Lower	CI95 - Upper	EC50rel, nM	CI95 - Lower	CI95 - Upper
H3 1-20										no binding
H3tetraac	607900	N/A	-4.76183	0.154823	-5.011	-4.436	>1000	>1000	>1000	very weak
H4 1-23										no binding
H4tetraac	auto	1-4	-9.16442	0.0129211	-9.192	-9.136	0.684819	0.642688	0.731139
	contraint note: prism value for H4 Tetra ac. The signal plateaued
BRD4 nuc (Ext. Figure 6B)	high constraint	Exluded pts	Log EC50rel	SEM	CI95 - Lower	CI95 - Upper	EC50rel	CI95 - Lower	CI95 - Upper
NCP-unmodified										no binding
H3tetraac										no binding
H4tetraac	auto	2	-8.13397	0.00815591	-8.152	-8.117	7.34559	7.04693	7.63836
Table (Ext. Figure 6C)
H3tetraac (1-20)	607900	N/A	-4.76183	0.154823	-5.011	-4.436	>1000	>1000	>1000	very weak
H4tetraac (1-23)	auto	1-4	-9.16442	0.0129211	-9.192	-9.136	0.684819	0.642688	0.731139
H3 1-20										no binding
H4 1-23										no binding
H3tetraac										no binding
H4tetraac	auto	2	-8.13397	0.00815591	-8.152	-8.117	7.34559	7.04693	7.63836
NCP-unmodified										no binding
Extra
GST BPTF PHD-BD (peptide)	high constraint	Exluded pts	Log EC50rel, M	SEM	CI95 - Lower	CI95 - Upper	EC50rel, nM	CI95 - Lower	CI95 - Upper
H3 (1-20)	232704	1	-6.8572	0.298084	too wide	too wide	138.932	too wide	too wide
H3K4me1 (1-20)	auto	1-4	-9.45678	0.019225	-9.499	-9.415	0.349316	0.316957	0.384592
H3K4me2 (1-20)	auto	1-4	-9.46534	0.0144711	-9.497	-9.434	0.342497	0.31842	0.368129
H3K4me3 (1-20)	auto	1-4	-9.37833	0.0342585	-9.452	-9.303	0.418472	0.353183	0.497737
	Constrained to average max of H3 (1-20); reached plateau.
HIS BPTF PHD-BD (peptide)	high constraint	Exluded pts	Log EC50rel, M	SEM	CI95 - Lower	CI95 - Upper	EC50rel, nM	CI95 - Lower	CI95 - Upper
H3 (1-20)										no binding
H3K4me1 (1-20)	auto	N/A	-6.83656	0.0116192	-6.862	-6.81	145.694	137.404	154.882
H3K4me2 (1-20)	auto	N/A	-7.17767	0.00786055	-7.194	-7.161	66.4243	63.9735	69.024
H3K4me3 (1-20)	auto	1	-7.67866	0.0127756	-7.705	-7.652	20.9575	19.7242	22.2844
	Constrained to average max of H3K4me3 (1-20); reached plateau.
GST BPTF PHD-BD (Nuc)	high constraint	Exluded pts	Log EC50rel, M	SEM	CI95 - Lower	CI95 - Upper	EC50rel, nM	CI95 - Lower	CI95 - Upper
NCP-unmodified										no binding
H3K4me3	auto	N/A	-7.20099	0.00337389	-7.208	-7.194	62.9522	61.9441	63.9735
H3Ktriac										no binding
H3K4me3triac	auto	N/A	-8.2362	0.0110767	-8.259	-8.213	5.80492	5.50808	6.1235
H3K4me2triac	auto	N/A	-8.0883	0.00924108	-8.108	-8.069	8.16027	7.7983	8.531
H3K4me1triac	auto	N/A	-7.04425	0.00496829	-7.055	-7.034	90.3133	88.1049	92.4698
N△1 H3K4me3triac	462518	N/A	-6.24386	0.0543284	too wide	too wide	570.354	too wide	too wide
N△2 H3K4me3triac										no binding
N△3 H3K4me3triac										no binding
N△1 H3triac										no binding
N△2 H3triac										no binding
N△3 H3triac										no binding
HIS BPTF PHD-BD (Nuc)	high constraint	Exluded pts	Log EC50rel, M	SEM	CI95 - Lower	CI95 - Upper	EC50rel, nM	CI95 - Lower	CI95 - Upper
NCP-unmodified										no binding
H3K4me3,K9ac	234442	N/A	-6.3815	0.0154008	-6.424	-6.349	415.428	376.704	447.713
H3K4me3,K14ac	auto	N/A	-7.43371	0.0169883	-7.47	-7.397	36.8372	33.8844	40.0867
H3K4me3,K18ac	auto	N/A	-7.37074	0.0327891	-7.441	-7.293	42.5858	36.2243	50.9331
H3K4me3triac	auto	N/A	-7.83645	0.017626	-7.873	-7.799	14.5729	13.3968	15.8855
H3Ktriac										no binding
H3tetraac										no binding
H3K4me2triac	auto	N/A	-7.2136	0.0064016	-7.227	-7.2	61.1504	59.2925	63.0957
H3K4me1triac	257156	N/A	-5.54768	0.0419156	-5.641	-5.461	>1000	>1000	>1000
N△1 H3K4me3triac										no binding
N△2 H3K4me3triac										no binding
N△3 H3K4me3triac										no binding
N△1 H3triac										no binding
N△2 H3triac										no binding
N△3 H3triac										no binding
H3K4me1										no binding
H3K4me2										no binding
H3K4me3	234442	N/A	-5.82067	0.0121284	-5.845	-5.794	>1000	>1000	>1000
HIS BPTF PHD-BD (peptide)	high constraint	Exluded pts	Log EC50rel, M	SEM	CI95 - Lower	CI95 - Upper	EC50rel, nM	CI95 - Lower	CI95 - Upper
H3 1-20										no binding
H3K4ac	121063	N/A	-6.46231	0.0152189	-6.494	-6.248	344.897	320.627	564.937
H3K9ac	121063	N/A	-6.48399	0.0144923	-6.514	-6.452	328.107	306.196	353.183
H3K14ac	121063	N/A	-6.37535	0.00928921	-6.395	-6.355	421.352	402.717	441.57
H3K18ac	121063	N/A	-6.54855	0.0118707	-6.572	-6.525	282.781	267.917	298.538
H3tetraac	121063	N/A	-6.51006	0.0189935	-6.549	-6.468	308.99	282.488	340.408
H4 1-23										no binding
H4K5ac	121063	N/A	-6.03928	0.0299336	-6.1	-5.97	913.523	794.328	>1000
H4K8ac	121063	N/A	-5.77805	0.0162805	-5.809	-5.743	>1000	>1000	>1000
H4K12ac	121063	N/A	-5.72842	0.0371721	-5.794	-5.646	>1000	>1000	>1000
H4K16ac	121063	N/A	-6.28141	0.0146375	-6.312	-6.25	523.11	487.528	562.341
H4tetraac	121063	N/A	-6.53315	0.00615194	-6.543	too wide	292.986	286.418	too wide
	Notr: Top constrained to H4tetraac since max counts in assay. No targets plateaued.

## Sheet: B_EC50 Compare
	Peptide and Nuc
	Goal: Demonstrate differences / trend similarities
EC50rel (CI95)
Peptides	GST PHD-BD	6His PHD-BD	GST PHD	6His PHD	6His BD
H3 1-20	ND	ND	-	ND	ND
H3K4me3	0.88 (0.75-1.02)	21.0 (19.7-22.3)	-	41.8 (39.1-44.8)	-
H3tetraac	2.4 (2.07-2.69)	309 (282-340)	-	ND	>1000
H3K4me3triac	1.3 (1.07-1.58)	-	-	100 (96.2-104.2)	>1000
Nucleosomes	GST PHD-BD	6His PHD-BD	GST PHD	6His PHD	6His BD
NCP-unmodified	ND	ND	ND	ND	ND
H3K4me3	77.8 (69.8-86.9)	>1000	346 (344-348)	> 1000	ND
H3triac	ND	ND	ND	-	ND
H3tetraac	61 (59.0-63.1)	ND	-	ND	ND
H3K4me3triac	3.0 (2.4-3.2)	15.3 (14.2-16.5)	38.7 (38.3-39.1)	325 (316-335)	ND
	Goal: Demonstrate accessibility and co-operative binding
EC50rel (CI95)
	GST PHD	GST PHD-BD	GST PHD(W2891A)-BD	GST PHD-BD (N3007A)	6His PHD	6His PHD-BD
NCP-unmodified	ND	ND	ND	ND	ND	ND
H3K4me3	346 (344-348)	77.8 (69.8-86.9)	ND	38.4 (36.8-40.3)	>1000	>1000
H3triac	ND	ND	-	-	-	ND
H3tetraac	ND	61 (59.0-63.1)	ND	ND	ND	ND
H3K4me3triac	38.7 (38.3-39.1)	3.0 (2.4-3.2)	ND	11.6 (11.4-11.9)	100 (96-104)	14.6 (13.4-15.9)
H3K4me3,K9ac	101 (96-107)	26.1 (24.9-27.4)	-	-	-	415 (377-448)
H3K4me3,K14ac	98.0 (92-104)	6.3 (6.2-6.4)	-	-	-	36.8 (33.9-40.1)
H3K4me3,K18ac	115 (107-123)	7.1 (6.7-7.5)	-	-	-	42.6 (36.2-51.0)
EC50rel Fold difference compared to H3K4me3 (if >1000, 1000 was used). Computation = EC50rel / H3K4me3 EC50rel
	GST PHD	GST PHD-BD	GST PHD(W2891A)-BD	GST PHD-BD (N3007A)	6His PHD	6His PHD-BD
NCP-unmodified	ND	ND	ND	ND	ND	ND
H3K4me3	1	1	ND	1	1	1
H3triac	ND	ND	-	-	-	ND
H3tetraac	ND	1.3	ND	ND	ND	ND
H3K4me3triac	8.9	25.9	ND	3.3	10	68.5
H3K4me3,K9ac	3.4	3	-	-	-	2.4
H3K4me3,K14ac	3.5	12.3	-	-	-	27.2
H3K4me3,K18ac	3	11	-	-	-	23.5

## Sheet: C_T-tests
	Unpaired t-tests were performed in GraphPad Prism using Log(EC50rel) and SEM. N = 2
Peptide	GST BPTF PHD-BD	LogEC50, M	SEM	EC50, nM
A	H3tetraac (1-20)	-8.62861	0.0266191	2.35177
B	H4tetraac (1-23)	-9.00115	0.0227555	0.99736
	Fold difference	2.35799
	Significantly Different?	yes
	P value	0.01
Peptide	GST BPTF PHD-BD	LogEC50	SEM	EC50, nM
A	H3K4me3 (1-20)	-9.05687	0.0311164	0.877271
B	H3K4me3triac (1-20)	-8.88591	0.040612	1.30044
C	H3tetraac (1-20)	-8.62861	0.0266191	2.35177
		Significantly Different?	P value
	A vs B	yes	0.0406
	A vs C	yes	0.0048
	B vs C	yes	0.018
Nuc	GST BPTF PHD-BD	LogEC50	SEM	EC50, nM
	H3K4me1	N/A	N/A	N/A
	H3K4me2	N/A	N/A	N/A
	H3K4me3	-7.63493	0.0100712	23.1775
	Binding to H3K4me1, H3K4me2 undetected. (Highest conc. Tested = 1000 nM)
	Fold difference (greater than)	43.1452	[1000 / H3K4me3 EC50]
Nuc	6His BPTF PHD-BD	LogEC50	SEM	EC50, nM
	H3K4me1	N/A	N/A	N/A
	H3K4me2	N/A	N/A	N/A
	H3K4me3	-5.82067	0.0121284	>1000
Nuc	GST BPTF PHD-BD	LogEC50	SEM	EC50, nM
A	H3K4me3	-7.10887	0.0226292	77.8264
B	H3tetraac	-7.21453	0.00685272	61.02
C	H3K4me3triac	-8.52482	0.0238897	2.98663
		Significantly Different?	P value	Fold Difference
	A vs B	yes	0.0241	1.27542
	A vs C	yes	0.0002	26.0582
	B vs C	yes	0.0001	20.431
Nuc	6His BPTF PHD-BD	LogEC50	SEM	EC50, nM
A	H3K4me3	-5.82067	0.0121284	>1000
B	H3tetraac	N/A	N/A	N/A
C	H3K4me3triac	-7.83645	0.017626	14.5729
		Significantly Different?	P value	Fold Difference
	A vs B	N/A	N/A	N/A
	A vs C	yes	0.0001	> 69
	B vs C	yes	N/A	> 69
Nuc	GST BPTF PHD-BD	LogEC50	SEM	EC50, nM
A	H3K4me3,K9ac	-7.58293	0.00998684	26.1258
B	H3K4me3,K14ac	-8.20153	0.00456056	6.28734
C	H3K4me3,K18ac	-8.15041	0.0126515	7.07277
D	H3K4me3triac	-8.30857	0.0158511	4.91396
		Significantly Different?	P value	Fold Difference
	A vs B	yes	0.0003	4.1553
	A vs C	yes	0.0008	3.69386
	A vs D	yes	0.0007	5.31665
	B vs C	no	0.0696	1.12492
	B vs D	yes	0.0224	1.27949
	C vs D	yes	0.0162	1.43932
Nuc	HIS BPTF PHD-BD	LogEC50	SEM	EC50, nM
A	H3K4me3,K9ac	-6.3815	0.0154008	415.428
B	H3K4me3,K14ac	-7.43371	0.0169883	36.8372
C	H3K4me3,K18ac	-7.37074	0.0327891	42.5858
D	H3K4me3triac	-7.83645	0.017626	14.5729
		Significantly Different?	P value	Fold Difference
	A vs B	yes	0.0005	11.2774
	A vs C	yes	0.0013	9.75508
	A vs D	yes	0.0003	28.5068
	B vs C	no	0.2318	1.15605
	B vs C	yes	0.0038	2.52779
	C vs D	yes	0.0065	2.92226
Nuc	GST BPTF PHD	LogEC50	SEM	EC50, nM
A	H3K4me3	-6.46111	0.00101312	345.848
B	H3tetraac	N/A	N/A	N/A
C	H3K4me3triac	-7.41256	0.00225997	38.6755
Nuc	HIS BPTF PHD	LogEC50	SEM	EC50, nM
A	H3K4me3	-5.19672	0.0215797	>1000
B	H3tetraac	N/A	N/A	N/A
C	H3K4me3triac	-6.48772	0.00606036	325.297
peptide	HIS BPTF BD	LogEC50	SEM	EC50, nM
A	H3tetraac (1-20)	-5.79352	0.00189048	>1000
B	H4tetraac (1-23)	-6.64901	0.00795812	224.383
	Fold Difference (greater than)	4.45667
Nuc	Query comparison	LogEC50	SEM	EC50, nM
A	H3K4me3triac	-8.52482	0.0238897	2.98663	GST BPTF PHD-BD
B	H3K4me3triac	-7.93535	0.00438379	11.6052	GST BPTF PHD-BD(N3007A)
	H3K4me3triac	-7.41256	0.00225997	38.6755	GST BPTF PHD
		Significantly Different?	P value	Fold Difference
	A vs B	yes	0.0012	3.88573
	A vs C	yes	0.0003	12.9495
	B vs C	yes	0.0001	3.33258
peptide	Query comparison	LogEC50	SEM	EC50, nM
A	H3tetraac (1-20)	-5.79352	0.00189048	>1000	HIS BPTF BD
B	H4tetraac (1-23)	-6.64901	0.00795812	224.383	HIS BPTF BD
C	H3tetraac (1-20)	-6.51006	0.0189935	308.99	HIS BPTF PHD-BD
D	H4tetraac (1-23)	-6.53315	0.00615194	292.986	HIS BPTF PHD-BD
		Significantly Different?	P value	Fold Difference
	A vs B	yes	0.0001	>4.5
	C vs D	no	0.3677	1.05463
Nuc	GST BPTF PHD-BD	LogEC50	SEM	EC50, nM
A	H3K4me3	-7.162	0.002	68.8652
B	H3K4me3,K14ac	-8.136	0.007	7.31139
C	H3.1<Unmod> · H3.1<K4me3>	-6.554	0.002	279.254
D	H3.1<Unmod> · H3.1<K4me3,K14ac>	-7.968	0.006	10.7647
E	H3.1<K4me3> · H3.1<K14ac>	-6.581	0.005	262.422
F
		Significantly Different?	P value	Fold Difference
	A vs B	yes	0.0001	9.4189
	A vs C	yes	0.0001	4.05509
	A vs D	yes	0.0001	6.39735
	A vs E	yes	0.0001	3.81066
	B vs C	yes	0.0001	38.1944
	B vs D	yes	0.003	1.47231
	B vs E	yes	0.0001	35.8922
	C vs D	yes	0.0001	25.9418
	C vs E	yes	0.04	1.06414
	D vs E	yes	0.0001	24.3781

## Sheet: D_Fig1C
		GST-BPTF-PHD-BD
		Alpha Counts
	Log Protein (M)	H3 1-20		H3K4me3		H3K4me3,K9,14,18ac		H3K4,9,14,18ac		H4 1-23		H4K5,8,12,16ac
	1e-06	234956	235684	243193	250087	255925	258566	309867	302337	188760	200391	94468	88832
	3.33e-07	301547	290620	275722	266748	272250	287049	398855	407551	345457	368399	295645	243760
	1.11e-07	25939	24897	385993	376186	344937	349220	522541	515407	414140	401020	552795	494253
	3.7e-08	10049	8350	468068	464444	404801	413921	529805	486422	185434	196930	625995	600835
	1.23e-08	10063	7401	572763	568717	509546	507747	439852	438175	114874	114780	622678	622808
	4.12e-09	5974	5942	588786	585343	511471	514911	383245	361715	78618	90833	612036	586720
	1.37e-09	2257	1792	385925	397273	262714	267224	157224	142086	28178	24722	409895	375671
	4.57e-10	1376	1166	172739	169227	116525	109814	36759	34437	6369	6216	129745	142324
	1.52e-10	1084	1114	65294	68616	42629	43013	5555	6037	1910	1799	65846	58328
	5.08e-11	1113	1154	25196	23803	18507	17373	1999	1666	1226	1297	7016	6279
	1.69e-11	1104	1154	8975	9727	7319	7045	1198	1202	1166	1184	1371	1336
	1e-12	1191	1168	1317	1149	1122	1203	1102	1198	1129	1129	1187	1022

## Sheet: E_Fig1D
		GST-BPTF-PHD-BD
		Alpha Counts
	Log Protein (M)	NCP-Unmodified		H3K4me3		H3K4me3triac		H3 Tetra Ac		H4 Tetra Ac
	1e-06	1297	776	389919	412360	336877	336950	432578	460533	1457	1580
	3.33e-07	1355	1090	395900	384131	353882	365372	450928	444328	1593	1565
	1.11e-07	1509	1247	294742	231932	366327	359124	375678	374686	1418	1467
	3.7e-08	1592	1456	90989	92906	352408	366235	92233	92895	1515	1431
	1.23e-08	1628	1600	3822	3393	301830	301687	2611	2585	1392	1312
	4.12e-09	1552	1551	1738	1504	203683	209604	1332	1313	1364	1316
	1.37e-09	1558	1572	1644	1442	121119	128042	1285	1303	1454	1269
	4.57e-10	1555	1539	1554	1560	38336	40994	1183	1267	1342	1245
	1.52e-10	1508	1521	1546	1472	14255	15047	1157	1200	1389	1284
	5.08e-11	1605	1541	1531	1506	4203	4501	1185	1205	1285	1285
	1.69e-11	1678	1516	1476	1413	2867	2661	1193	1223	1292	1263
	1e-12	1506	1548	1337	1584	1357	1372	1177	1131	1296	1196

## Sheet: F_Fig2B (upper)
		GST-BPTF-PHD-BD(N3007A)
		Alpha Counts
	Log Protein (M)	NCP-Unmodified		H3K4me3		H3 Tetra Ac		H3K4me3triac		H4 Tetra Ac
	1e-06	6968	6013	1183297	1169893	5600	4779	1200472	1170980	6411	6906
	3.333e-07	7573	6666	1153488	1069950	5703	5076	1201510	1180361	7246	7734
	1.111e-07	7151	6290	1063339	1099831	6005	5140	1216704	1180904	7340	7877
	3.704e-08	7680	7524	562115	531191	5932	4953	1178442	1152825	7408	7644
	1.235e-08	7502	8236	25934	20267	5996	5503	685994	635338	7240	7681
	4.115e-09	7915	7947	9808	9927	6291	6398	39534	44681	7750	7662
	1.372e-09	7548	7961	8905	8709	6206	6076	8645	8127	7532	7958
	4.572e-10	7178	7721	8496	8544	6045	6018	7254	7431	7366	7497
	1.524e-10	7151	7559	8526	8123	6366	6211	7215	6967	7350	7470
	5.081e-11	7387	7642	8281	7949	6092	5818	7033	6708	7205	7192
	1.694e-11	7664	7227	8078	7804	6136	5461	6880	6747	6824	7258
	1e-12	7121	7460	7919	7708	5976	5805	6600	6650	6781	6897

## Sheet: G_Fig2B (lower)
		GST-BPTF-PHD(W2891A)-BD
		Alpha Counts
	Log Protein (M)	NCP-Unmodified		H3K4me3		H3 Tetra Ac		H3K4me3triac		H4 Tetra Ac
	1e-06	7971	7766	9624	9161	6700	6362	6833	6995	7281	7133
	3.333e-07	8375	8721	10790	9769	6637	6619	7904	8046	8430	7922
	1.111e-07	8931	8345	10830	9852	6821	6602	8094	8266	8079	8209
	3.704e-08	9351	9088	10408	9855	6752	6602	8189	8250	8239	8288
	1.235e-08	8993	8558	10370	9725	6606	6477	7865	7827	7764	7738
	4.115e-09	9181	9021	9927	9410	6421	6498	7758	8028	7913	7784
	1.372e-09	9042	8365	10131	9249	6779	6367	7537	7775	7422	7565
	4.572e-10	8503	8200	10013	9211	6332	6374	7377	7228	7472	6773
	1.524e-10	8390	8232	9164	9694	6401	6226	7273	7036	6935	6447
	5.081e-11	8175	8422	9134	8801	5736	6075	7124	7302	7783	7379
	1.694e-11	7979	8046	8597	9391	5955	5860	6947	6883	7023	7188
	1e-12	8226	8480	8590	9266	6032	5973	6783	7013	7195	7042

## Sheet: H_Fig3B
		6His-BPTF-PHD-BD
		Alpha Counts
	Log Protein (M)	NCP-Unmodified		H3K4me3		H3K4me3triac		NΔ1H3K4me3triac
	1e-06	380	531	80201	68354	243215	241120	462	439
	3.33e-07	369	429	13482	13505	247382	273502	383	373
	1.11e-07	513	450	2032	1634	257042	257269	435	587
	3.7e-08	492	519	587	499	211848	215718	275	353
	1.23e-08	554	501	450	411	110188	107437	309	335
	4.12e-09	449	460	387	472	18908	20518	554	501
	1.37e-09	448	516	413	409	1798	1779	413	445
	4.57e-10	474	547	465	330	547	505	381	491
	1.52e-10	500	512	547	510	371	351	309	361
	5.08e-11	501	480	314	345	397	372	377	356
	1.69e-11	481	481	16	755	362	299	434	299
	1e-12	454	496	387	311	326	372	341	305

## Sheet: I_Fig5A
			GST-BPTF-PHD-BD
			Alpha Counts
		Log (Protein) M	NCP-Unmodified		H3K4me3		H3K14ac		H3triac		H3K4me3K14ac		H3K4me3triac		[H3 · H3K4me3]		[H3 · H3K14ac]		[H3 · H3K4me3K14ac]		[H3K4me3 · H3K14ac]		[H3K4me3 · H3triac]
		1e-06	189	324	34210	35375	198	180	282	388	39350	38329	32808	31524	29852	29508	194	296	29982	31965	30958	31419	28246	27125
		3.33e-07	300	407	44245	44436	212	216	356	421	51343	49942	46722	45877	19502	18992	300	389	41303	40495	21617	20351	25378	24733
		1.11e-07	323	416	35624	35234	277	208	347	471	57520	55803	55431	54323	2149	2013	328	402	46408	45704	3506	3121	7568	7552
		3.7e-08	383	435	6877	7227	282	221	398	474	55153	54224	57974	56519	555	494	356	407	43965	42633	375	348	520	527
		1.23e-08	440	421	452	495	263	241	402	453	40931	39760	46979	46472	477	435	351	379	26786	25841	254	268	287	264
		4.12e-09	425	425	254	240	272	300	384	416	16686	16383	24675	24158	378	398	337	370	7119	6683	286	268	231	226
		1.37e-09	380	393	236	245	286	295	333	389	3815	3765	7633	7934	414	398	365	389	1086	1024	267	245	222	254
		4.57e-10	417	399	213	226	240	268	402	411	778	825	1565	1703	370	380	347	351	426	403	250	226	199	227
		1.52e-10	412	394	213	254	263	273	343	370	416	416	421	460	393	388	365	381	324	365	282	259	254	217
		5.08e-11	458	430	245	208	268	273	374	374	389	449	249	264	384	399	369	361	375	292	263	328	250	217
		1.69e-11	380	407	185	241	245	260	341	388	370	390	236	245	435	375	381	360	337	343	279	217	217	227
		1e-12	352	407	254	245	269	259	380	366	402	365	264	222	379	394	339	398	342	343	242	245	236	213

[truncated: 13 more sheets: J_Ext.Fig1B, K_Ext.Fig1C, L_Ext.Fig1D, M_Ext.Fig1E, N_Ext.Fig1F, O_Ext.Fig2C, P_Ext.Fig2D, Q_Ext.Fig2E, R_Ext.Fig2F, S_Ext.Fig2G, T_Ext.Fig3D, U_Ext.Fig4A, V_Ext.Fig4B]
